# Supplementary material
Source: publisher figshare collection journal article supplement (https://acs.figshare.com/ndownloader/files/4112788)
Supplement: Supplementary file 1 [file 4112788]

## Supporting Information

Effect of solvent quality on the solution properties of assemblies of partially-fluorinated amphiphilic diblock copolymers

*Hui Peng,<sup>1</sup> Kristofer J. Thurecht,<sup>1</sup> Idriss Blakey,<sup>1,2</sup> Elena Taran<sup>1,3</sup> and Andrew K. Whittaker<sup>1,2\*</sup>*

<sup>1</sup>Australian Institute for Bioengineering and Nanotechnology, <sup>2</sup>Centre for Advanced Imaging,

<sup>3</sup>Australian National Fabrication Facility Queensland Node, The University of Queensland, St. Lucia 4072, Australia

\*Corresponding author:

Tel: +61-7-33463885; Fax: +61-7-33463973; E-mail address: [a.whittaker@uq.edu.au](mailto:a.whittaker@uq.edu.au)

S1.

The  $^1\text{H}$  NMR spectra of the amphiphilic copolymers in  $\text{DMF-}d_7$  are shown in Figure S1. In the spectrum of PAA-*b*-p(*n*BA-*co*-TFEA) (Figure 1(A)), the peaks marked from *a* to *l* could be assigned to the characteristic signals of protons of the PAA, P*n*BA and PTFEA segments. The peaks labelled *b* (2.55 ppm), *h* (2.46 ppm) and *e* (2.58 ppm) are assigned to the methine protons ( $-\text{CH}_2\text{CH}(\text{CO})-$ ) in the backbone belonging to PAA, P*n*BA and PTFEA. The peaks *f* at 4.76 ppm and *i* at 4.06 ppm were assigned to the methylene protons ( $-\text{CH}_2\text{CH}(\text{CO})-$ ) attached to the ester bond in the side chain belonging to PTFEA and P*n*BA blocks, and peak *c* at 12.6 ppm was assigned to the carboxylic acid protons of PAA. The  $^1\text{H}$  NMR spectra of PAA-*b*-p(*n*BA-*co*-TFEMA) were similar to PAA-*b*-p(*n*BA-*co*-TFEA) (see for example Figure 1(B)), but there are only two methine protons ( $-\text{CH}_2\text{CH}(\text{CO})-$ ), peak *b* at 2.55 ppm, and *h* at 2.45 ppm belonging to PAA and P*n*BA and a new resonance arising from the methyl protons ( $-\text{CH}_3$ ), *e*, 0.93 ppm) due to TFEMA.

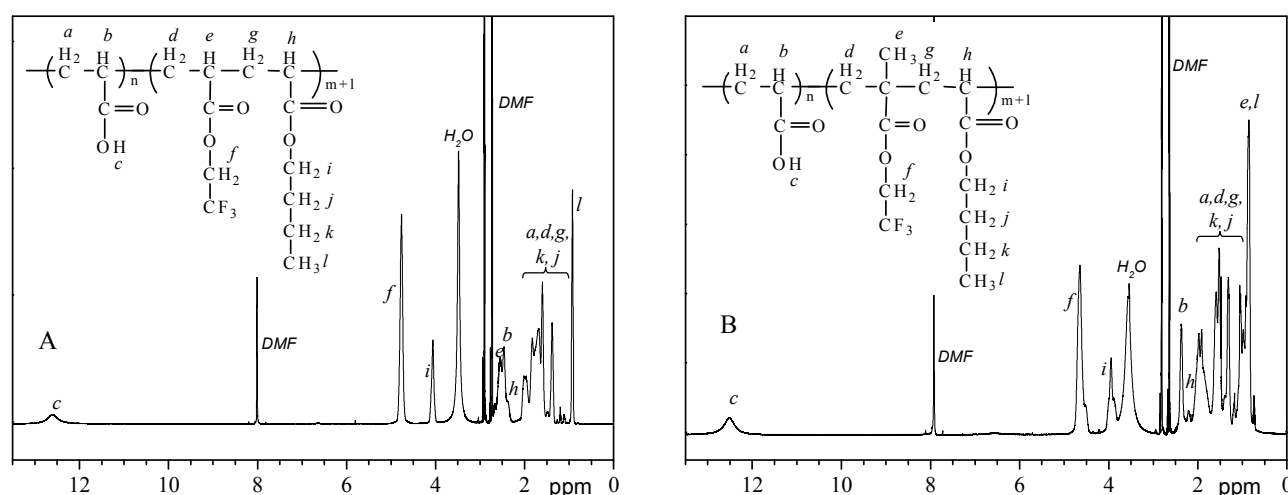

Figure S1. The  $^1\text{H}$  NMR spectra of (A) PAA<sub>50</sub>-*b*-P(*n*BA<sub>39</sub>-*co*-TFEA<sub>115</sub>) and (B) PAA<sub>52</sub>-*b*-P(*n*BA<sub>39</sub>-*co*-TFEMA<sub>103</sub>) in  $\text{DMF-}d_7$ .

S2.

The Flory-Huggins interaction parameter between blocks  $\chi_{A-B}$  can be estimated by <sup>1</sup>

$$\chi_{A-B} = \frac{V_r(\delta_A - \delta_B)^2}{RT}$$

where  $V_r$  is the molar volume of the blocks,  $R$  is the gas constant,  $T$  is the temperature (298 K), and  $\delta_A$  and  $\delta_B$  are the solubility parameters of the different blocks, respectively. <sup>2</sup>

|                                                                              | PAA   | PnBA   | PTFEA  | PTFEMA |
|------------------------------------------------------------------------------|-------|--------|--------|--------|
| Solubility parameters ( $\delta_A$ )<br>(MPa <sup>1/2</sup> )                | 24.6  |        |        |        |
| Solubility parameters ( $\delta_B$ )<br>(MPa <sup>1/2</sup> )                |       | 18.0   | 17.5   | 17.1   |
| Molar volume ( $V_r$ )<br>(cm <sup>3</sup> /mol <sup>-1</sup> ) <sup>2</sup> | 58.76 | 122.54 | 102.01 | 118.29 |

1. Polymer Handbook, 4th ed.; Brandrup, J.; Immergut, E. H.; Grulke, E. A.; Abe, A.; Bloch, D. R., Eds. Wiley: New York, 1999. P521
2. D.W. Van Krevelen, Properties of polymers : their correlation with chemical structure; their numerical estimation and prediction from additive group contributions , Elsevier (Amsterdam), 1990.

|                                                                                                                                          |                                                                                        |                                                                                         |                                                                                          |
|------------------------------------------------------------------------------------------------------------------------------------------|----------------------------------------------------------------------------------------|-----------------------------------------------------------------------------------------|------------------------------------------------------------------------------------------|
| A<br>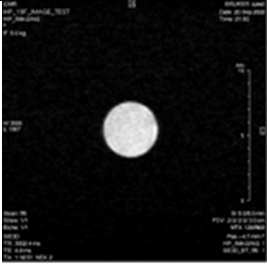                                                   | B<br> | C<br> | D<br> |
| DMF<br>S/N=41.0                                                                                                                          | DMF:D <sub>2</sub> O=1:1<br>S/N=8.8                                                    | Acetone<br>S/N=20.7                                                                     | Acetone:D <sub>2</sub> O=1:1<br>S/N=17.5                                                 |
| PAA <sub>50</sub> - <i>b</i> -P( <i>n</i> BA <sub>39</sub> - <i>co</i> -TFEA <sub>115</sub> ) 2.0 wt.%; RT (S/N: Signal-to-Noise Ratio)  |                                                                                        |                                                                                         |                                                                                          |
| E<br>                                                   | F<br> | G<br> | H<br> |
| DMF<br>S/N=27.8                                                                                                                          | DMF:D <sub>2</sub> O=1:1<br>S/N=2.4                                                    | Acetone<br>S/N=17.8                                                                     | Acetone:D <sub>2</sub> O=1:1<br>S/N=8.9                                                  |
| PAA <sub>52</sub> - <i>b</i> -P( <i>n</i> BA <sub>39</sub> - <i>co</i> -TFEMA <sub>103</sub> ) 2.0 wt.%; RT (S/N: Signal-to-Noise Ratio) |                                                                                        |                                                                                         |                                                                                          |

Figure S3. Selected slices from the 3D spin echo <sup>19</sup>F MRI images of solutions of block copolymer assemblies in mixed solvent. The field of view in each case is 20×20 mm<sup>2</sup>.
